# Supplementary material for: A microfluidic flow-stretch chip for investigating blood vessel biomechanics
Source: Royal Society of Chemistry journal article supplement (doi:10.1039/c2lc40173h), 2012-01-01
Supplement: c2lc40173h.pdf [file c2lc40173h.pdf]

## Supporting information

### A microfluidic flow-stretch chip for investigating blood vessel biomechanics

Wenfu Zheng, Bo Jiang, Dong Wang, Wei Zhang, Zhuo Wang, Xingyu Jiang \*

*CAS Key Lab for Biological Effects of Nanomaterials and Nanosafety, National Center for NanoScience & Technology, 11 ZhongGuanCun BeiYiTiao, Beijing 100190, China*

### The wall shear stress calculation

In our experiments, the flow rate was translated to shear stresses based on the Purday approximation<sup>1</sup>,

$$\tau = \frac{2\mu Q}{wh^2} \left(\frac{m+1}{m}\right)(n+1)$$

where  $\tau_w$  is the wall shear stress,  $\mu$  is the dynamic viscosity of the medium (dyne s/cm<sup>2</sup>),  $Q$  is the volumetric flow rate (cm<sup>3</sup>/s),  $w$  is the width of the microchannel (cm), and  $h$  is the height of the microchannel (cm),  $m$  and  $n$  are empirical parameters. In our experiments, width  $w = 1500 \mu\text{m}$  (0.15 cm), height  $h = 500 \mu\text{m}$  (0.05 cm), and<sup>2</sup> viscosity of the culture medium at 37 °C is  $\mu = 0.1 \text{ dynes/cm}^2$ . For aspect ratio<sup>3</sup>  $\alpha = h/w < 1/3$ ,  $m = 1.7 + 0.5 \alpha^{-1.4} = 4.03$  and  $n = 2$ . For  $Q = 0.78 \text{ mL min}^{-1}$ , the wall shear stress on cells was calculated and set as  $26.25 \text{ dyn/cm}^2$ .

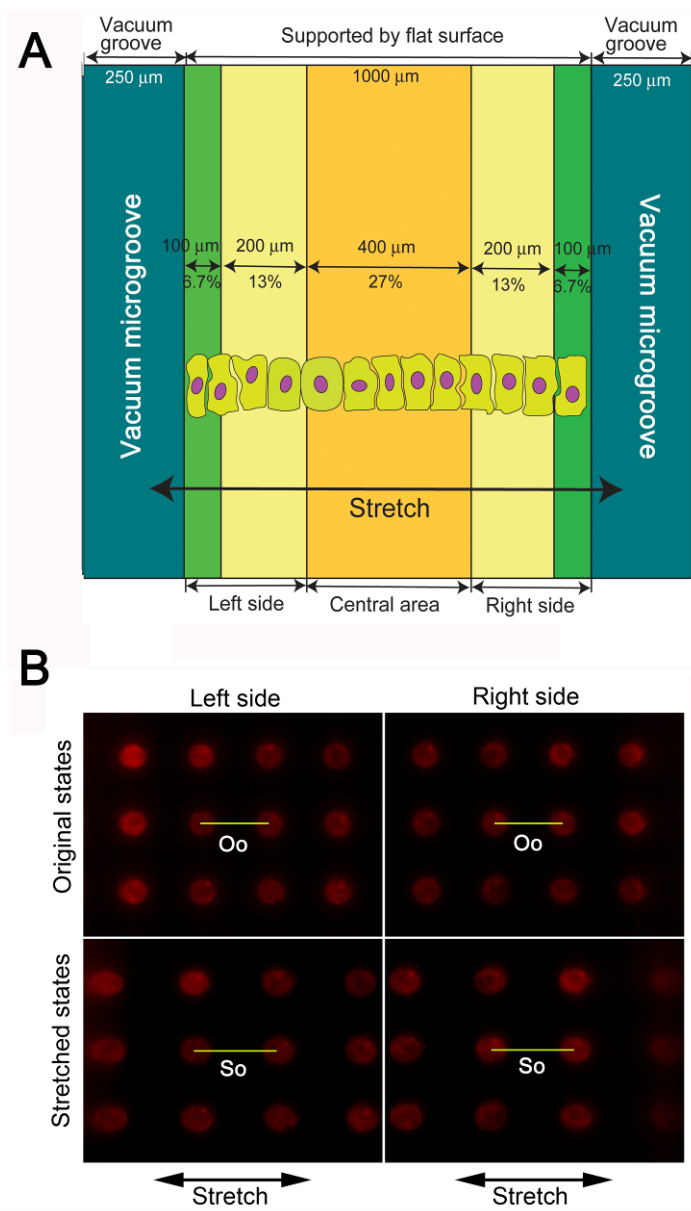

Fig. S1 A) The schematic illustration of elastic membrane in the microchannel. The width of the membrane above the support surface of the stretch layer is about 1000  $\mu\text{m}$  (orange part + yellow part + green part). During the stretching ( $\geq 20\%$ ), partial of the two side parts (green part, about 100  $\mu\text{m}$ ) of the membrane will slip down to the vacuum microgrooves. So, we measured the deformation of the membrane in the orange (central area, 400  $\mu\text{m}$ ) and yellow area (side area,  $2 \times 200 \mu\text{m}$ ) in the figure. B) The two side parts of the membrane at original and stretched states. The yellow lines in the images indicate the distance between the neighboring spots at the different states.

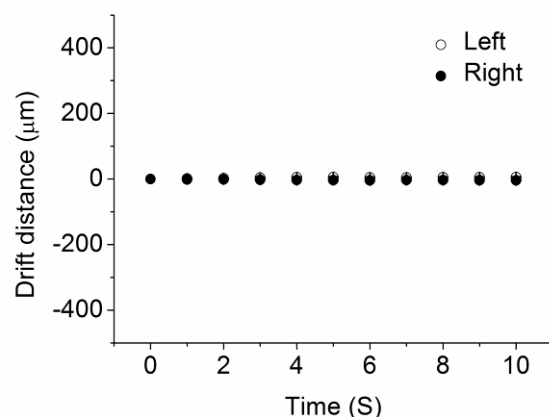

Fig. S2 The traveling trace of the microbeads in the microfluidic channel. The abscissa axis represents traveling time, the vertical axis represents the width of the transverse drift distance of the microbeads. The full scale of the vertical axis is the width of the microchannel (1000  $\mu\text{m}$ ). We set the lines passing through the original position of the beads and being parallel to the long axis of the microchannel as the object reference, the deviation to left side was measured as a plus number whereas right side as a minus number. The data show that the paths of the traveling microbeads are almost straight along the long axis of the microchannel.

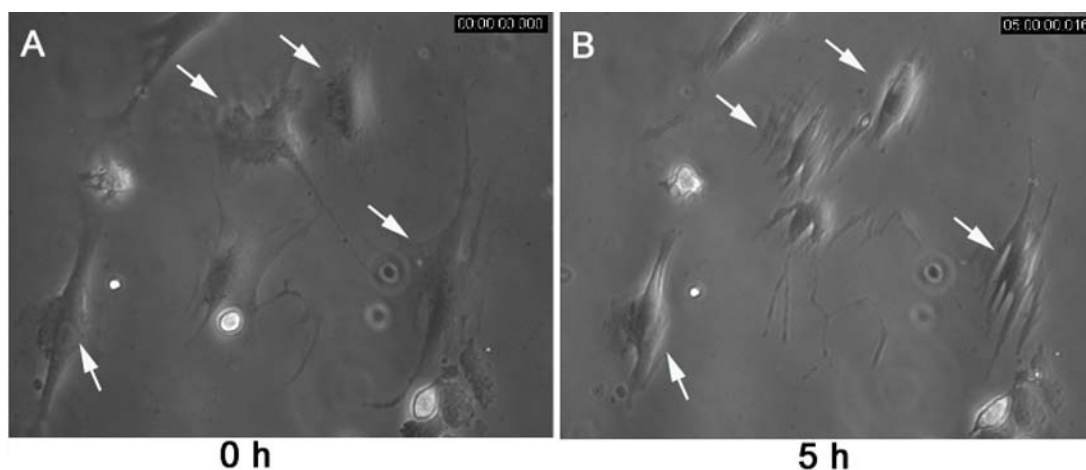

Fig. S3 The morphological remodeling of MSCs before (A) and after 5 hours of FSS-CS stimulation (B).

### References

1. R. K. Shah and A. L. London, *Laminar Flow Forced Convection in Ducts*, Academic Press, New York, 1978, pp. 196–202.
2. Lee, J. H., Lee, S. G., Khang, G., Lee, H. B., *J Colloid Interface Sci*, 2000, **230**, 84–90.
3. E. W. K. Young, A. R. Wheeler and C. A. Simmons, *Lab Chip*, 2007, **7**, 1759-1766.
